# Supplementary material
Source: PubMed Central journal article supplement (PMC4755301)
Supplement: NIHMS710677-supplement-Supplemental_Figure.pdf [file NIHMS710677-supplement-Supplemental_Figure.pdf]

Figure 1a

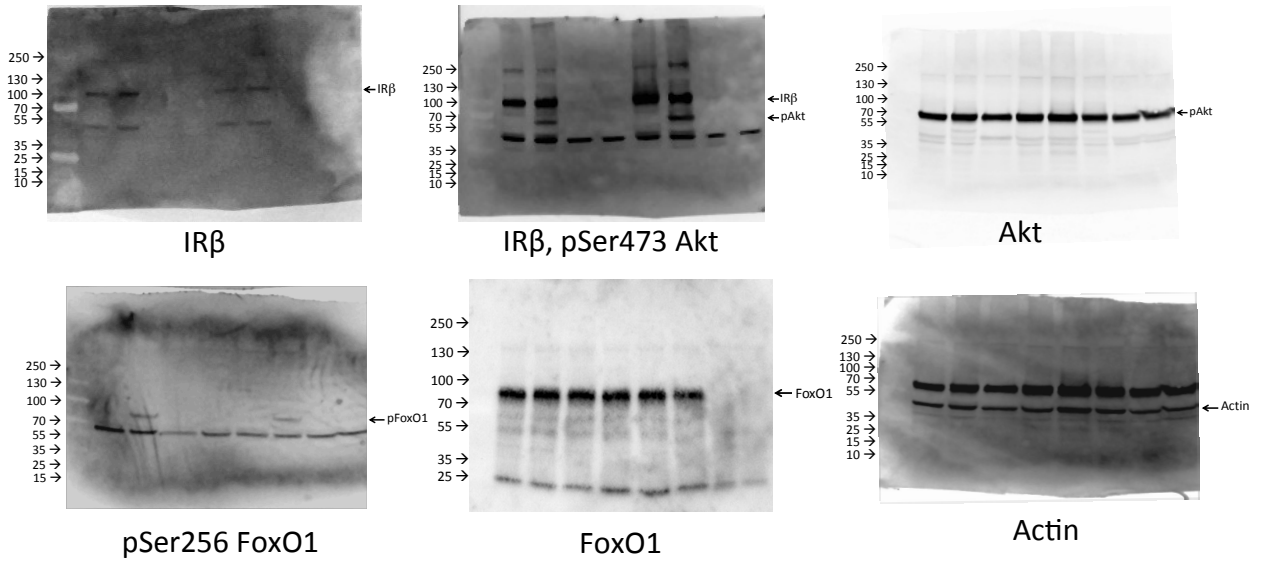

Figure 3c

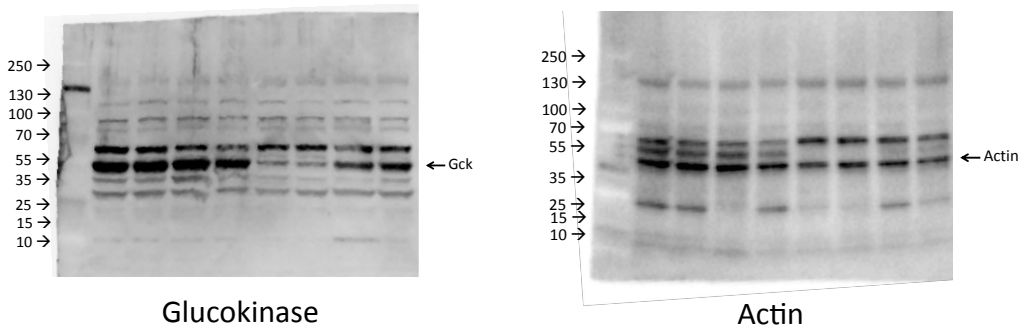

Figure 5f

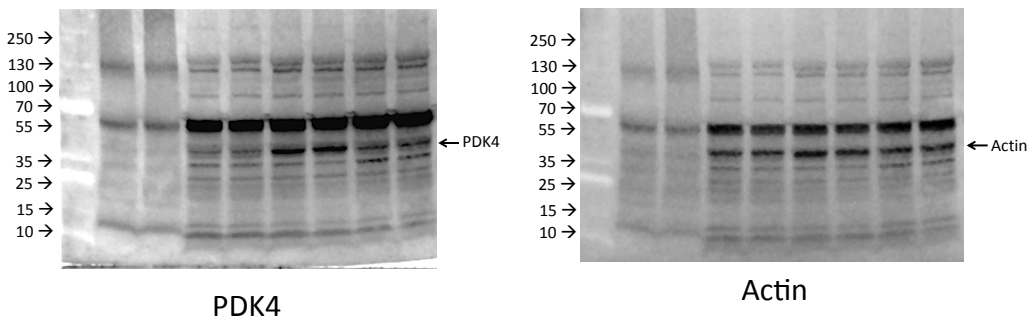

**Supplementary Figure 1: Original immunoblots.** Full length immunoblots are shown for the results presented in Figures 1a, 3c and 5f.
